# Supplementary material for: The Impact of the Functional Layer Composition of Glucose Test-Strips on the Stability of Electrochemical Response
Source: MDPI journal article supplement (doi:10.3390/chemosensors10080298), 2022-07-30
Supplement: s1 [file s1]

## Supplementary Materials

### The Role of Functional Layer Composition of Glucose Test-Strips on Stability of Electrochemical Response

*E.V. Zolotukhina<sup>1\*</sup>, E.V. Gerasimova<sup>1</sup>, V.V. Sorokin<sup>1</sup>, M.G. Levchenko<sup>1</sup>, A.S. Freiman<sup>1</sup>, Y.E. Silina<sup>2\*</sup>*

<sup>1</sup>*Institute of Problems of Chemical Physics of Russian Academy of Sciences, 142432 Chernogolovka, Russia*

<sup>2</sup>*Institute of Biochemistry, University of Saarland, Campus B 2.2, 66123, Saarbrücken, Germany*

*\*To whom the correspondence*

*should be addressed/\*authors with equal contribution*

*E-mail address 1: [zolek@icp.ac.ru](mailto:zolek@icp.ac.ru) (E.V. Zolotukhina)*

*E-mail address 2: [yuliya.silina@uni-saarland.de](mailto:yuliya.silina@uni-saarland.de); [yuliya.silina@gmx.de](mailto:yuliya.silina@gmx.de) (Y.E. Silina)*

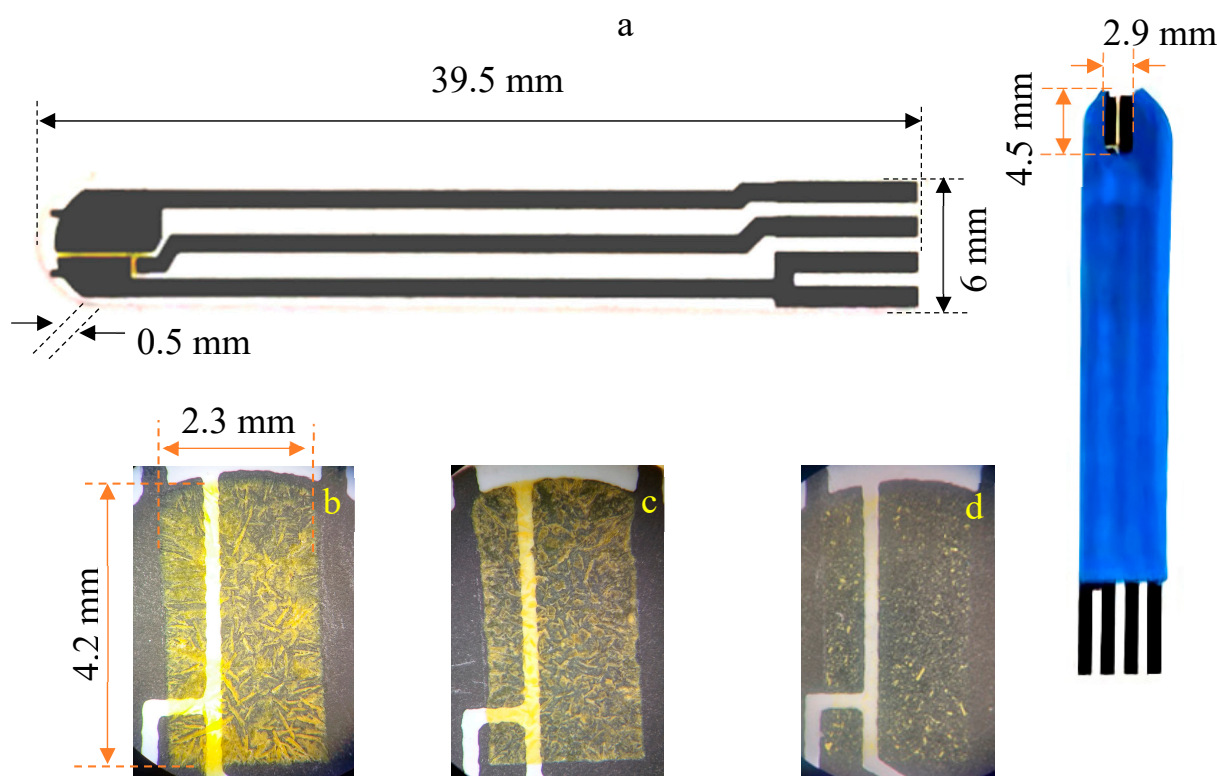

**Figure S1** – (a) The typical view and dimensions of SPE test-strips used in this study with and without a capillary gap. (b-d) Optical microscope images obtained from the dried functional layer deposited on the surface of SPE by screen-printing technique utilizing 60  $\mu\text{m}$  foil. The gel composition: (b) 10 mg/mL CMC, 25 mg/mL ALG, 200 mg/mL FC, 12 mg/mL GOx (in CitB, pH 6); (c) 10 mg/mL CMC, 50 mg/mL AS, 200 mg/mL FC, 12 mg/mL GOx (in CitB, pH 6); (d) 10 mg/mL CMC, 25 mg/mL AS, 25 mg/mL 9,10-Phenantroline-5,6-dione, 24 mg/mL GOx (in CitB, pH 6).

**Table S1** – Buffer systems abbreviation and composition

| Buffer system                                                 | Abbreviation | Used components                          | pH  |
|---------------------------------------------------------------|--------------|------------------------------------------|-----|
| 0.1 M citrate buffer                                          | CitB         | citric acid, NaOH                        | 6.0 |
| isotonic (0.15M NaCl)<br>0.05 M potassium<br>phosphate buffer | PPBI         | $\text{KH}_2\text{PO}_4$ , NaCl,<br>NaOH | 7.4 |
| 0.1 M acetate buffer                                          | AcB          | acetic acid, NaOH                        | 5.5 |

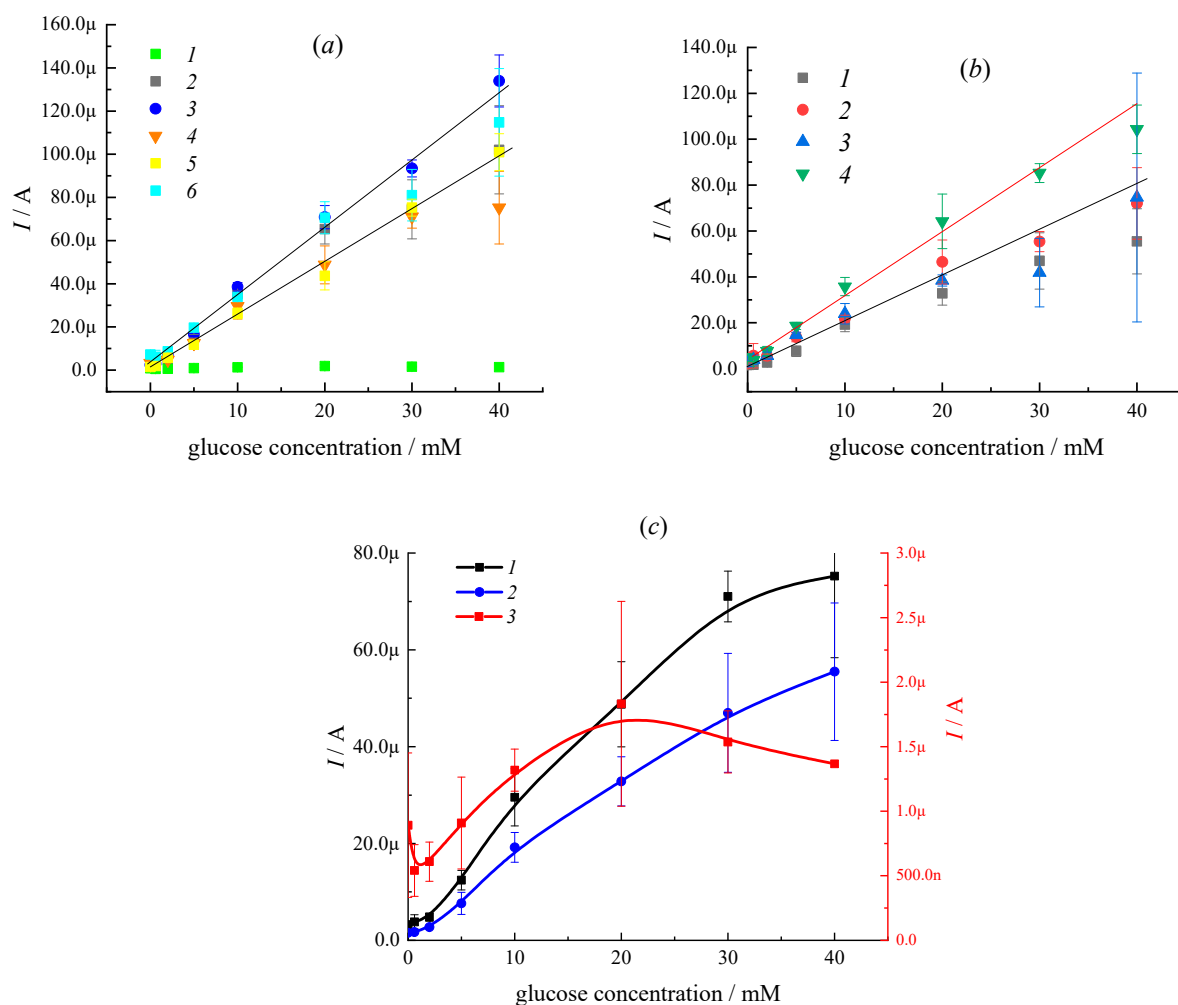**Figure S2** – Selected glucose calibration curves illustrating the influence of the gel content on the shape of the curves (current was recorded at 5 s):

(a) – shown for the gels with and without addition of sodium alginate, (b) – shown for the gels with addition of Aerosil 380; (c) – shown the S-type calibration for low content of FC or GOx

Gel composition in 0.1M citrate buffer, pH 6 was as follows:

(a) 1 – 20CMC/50FC/2GOx, 2 – 20CMC/200FC/12GOx, 3 – 20 CMC/200FC/24GOx,  
4 – 10CMC/15ALG/200FC/2GOx, 5 – 10CMC/15ALG/200FC/9GOx,  
6 – 10CMC/25ALG/200FC/9GOx.

(b) 1 – 20CMC/75AS/100FC/9GOx, 2 – 20CMC/75AS/150FC/9GOx,  
3 – 10CMC/50AS/150FC/9GOx, 4 – 10CMC/50AS/200FC/9GOx.

(c) 1 - 10CMC/15ALG/200FC/2GOx; 2 - 20CMC/75AS/100FC/9GOx; 3 - 20CMC/50FC/2GOx

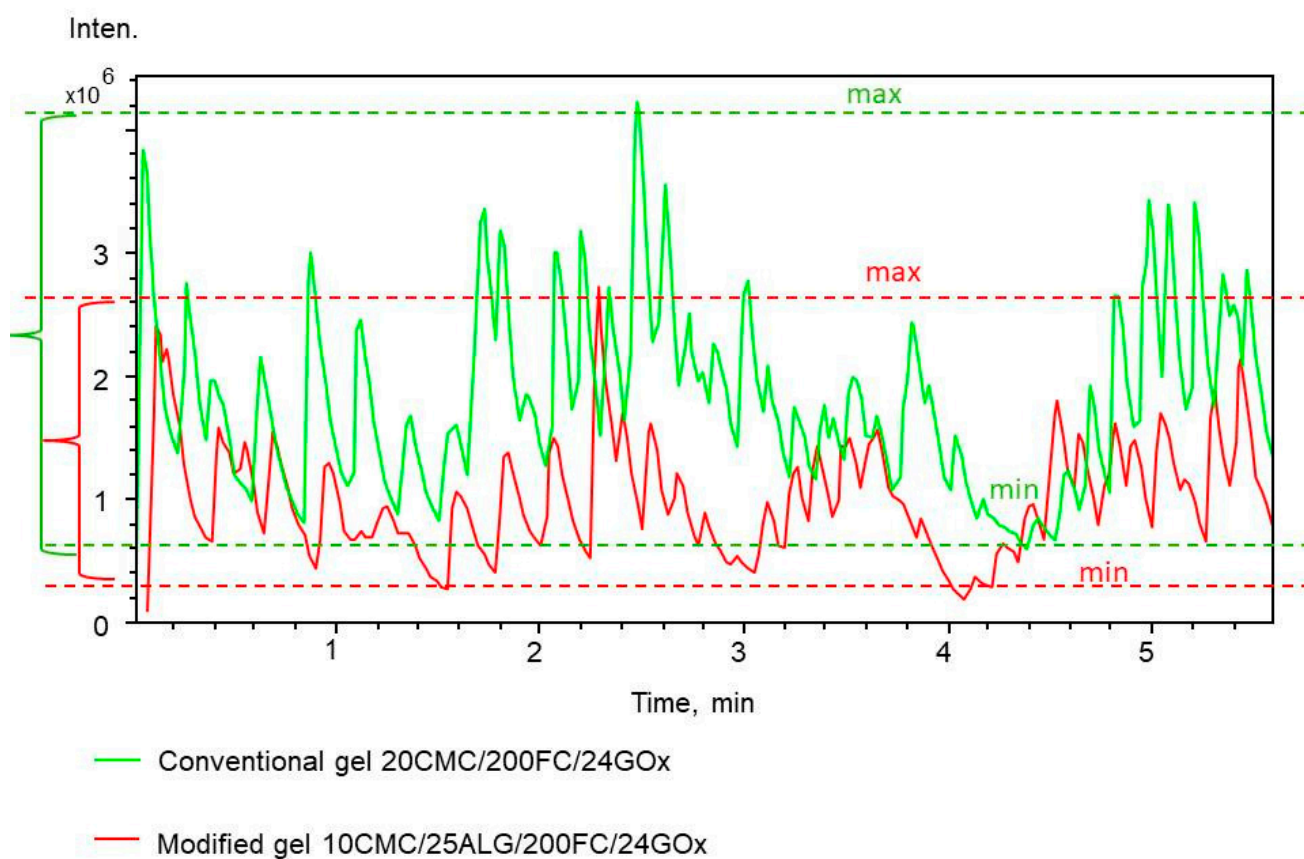

**Figure S3** – LDI-MS full scan TIC-chromatograms (all ions) obtained from SPE covered by conventional and modified gels via screen printing approach.

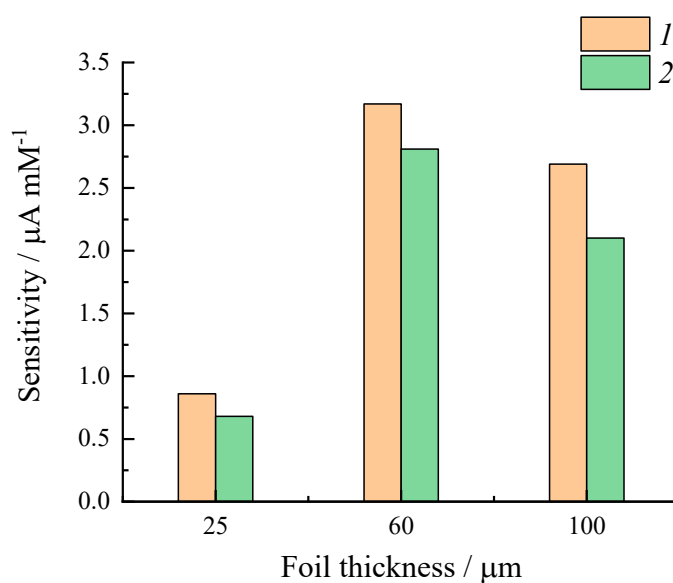

**Figure S4** – Impact of the thickness of functional layer on sensitivity of glucose test-strips based on 10CMC/25ALG/200FC/9GOx (1) and 10CMC/50AS/200FC/9GOx (2) gels.

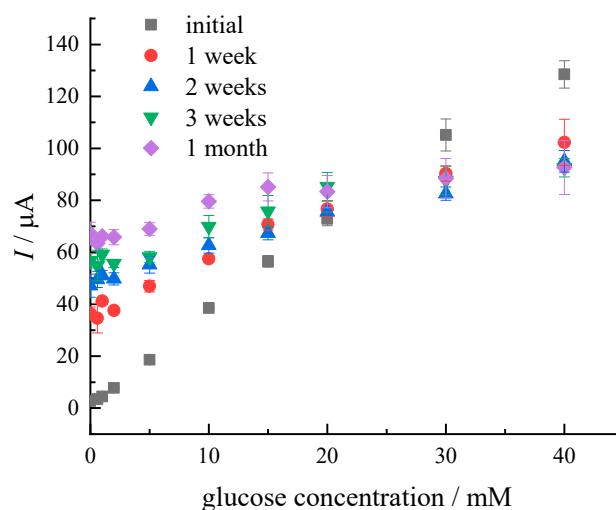

**Figure S5** – Current degradation recorded from glucose test-strips with the functional 10CMC/25ALG/200FC/24GOx (CitB, pH 6.0) layer after a short stress-heating test at 120 °C for 30 s (black curve) and consequent storage at 55 °C for 1-4 weeks (other colours).

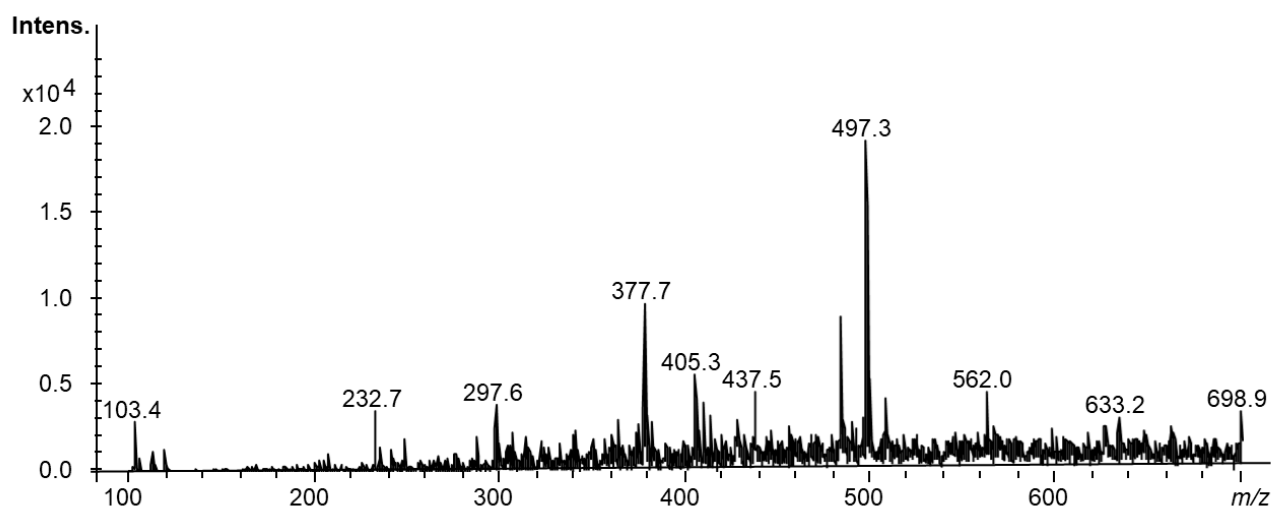

**Figure S6** – LDI-MS spectra obtained from SPE modified by FC in PPBI after storage for 3 days in the access of light at 55 °C.
